# Supplementary material
Source: PubMed Central journal article supplement (PMC4682299)
Supplement: supp_tpc.15.00517_TPC2015-00517-RAR2_Supplemental_Data_pdf.pdf [file supp_tpc.15.00517_TPC2015-00517-RAR2_Supplemental_Data_pdf.pdf]

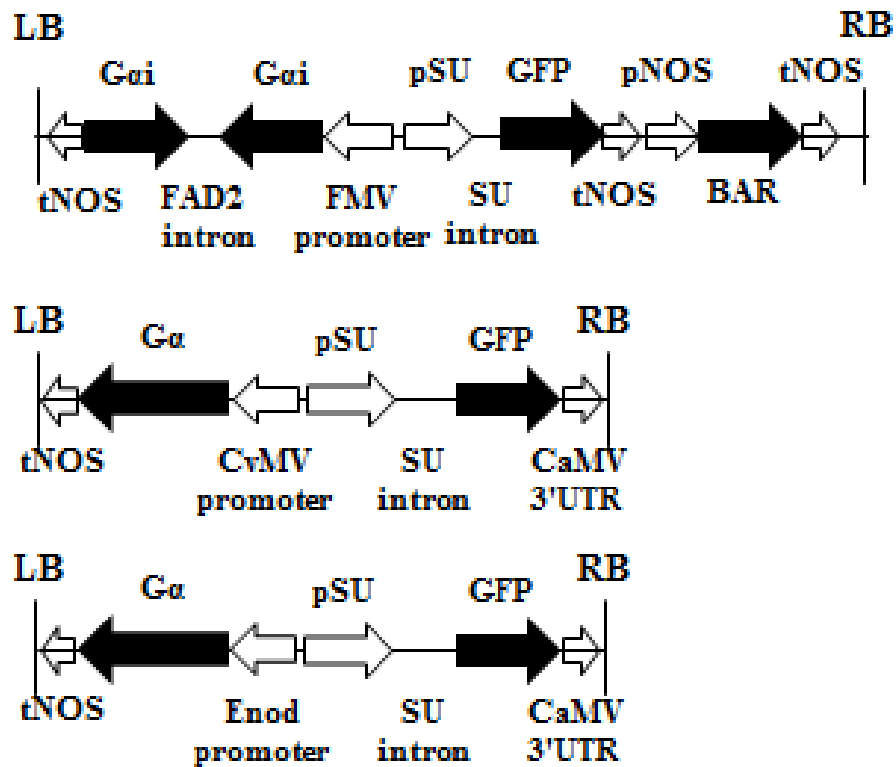

Supplemental Figure 1. Constructs used for RNAi-mediated silencing of soybean *Ga* and *RGS* driven by *FMV* promoter and for overexpression of *Ga* and *RGS* driven by constitutive (*CvMV*) and nodule-specific (*Enod40*) promoter. The selection markers *GFP* and *Bar* are driven by *pSU* promoter and *Nos* promoter, respectively.

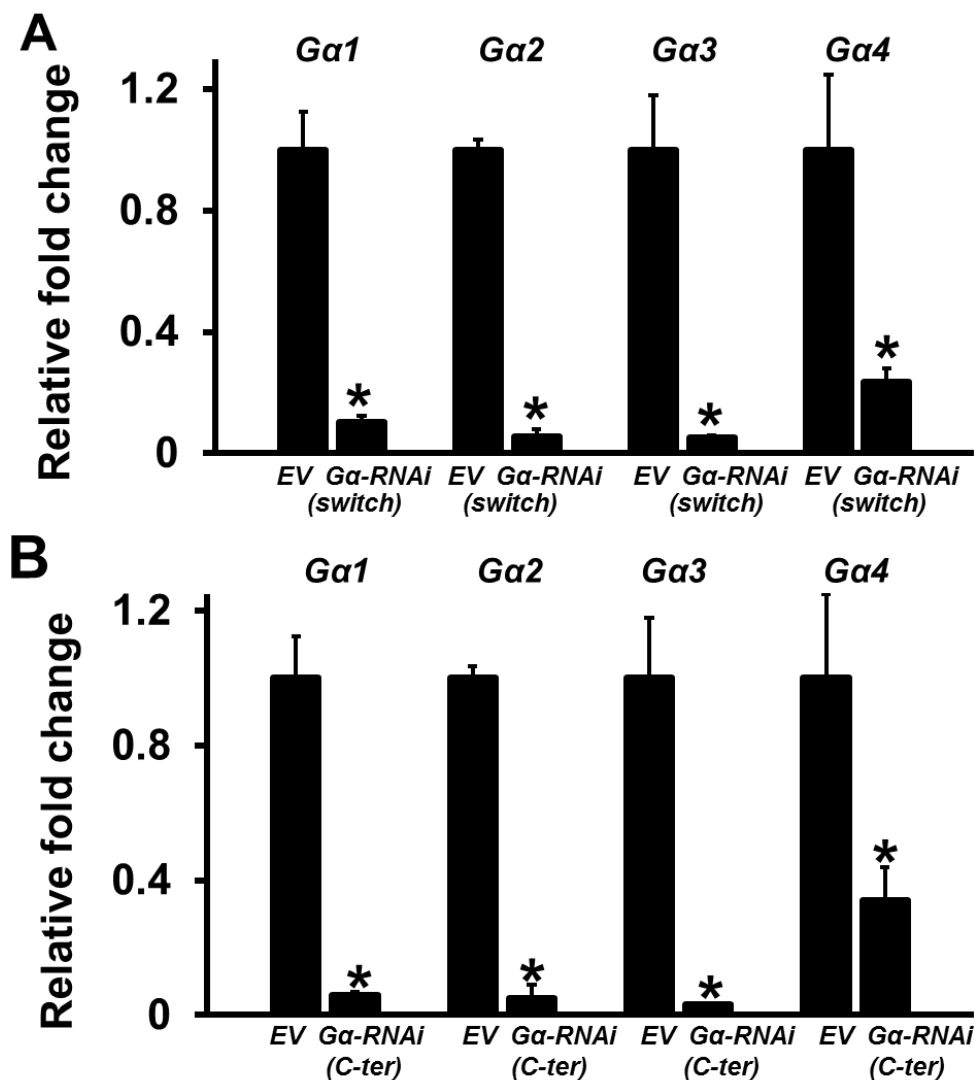

**Supplemental Figure 2. Transcript levels of soybean *Ga* genes in *Ga-RNAi* hairy roots and nodulation phenotypes.** Hairy roots of soybean were collected from specific *Ga-RNAi* lines at 32 dpi with *B. japonicum*. Expression of individual *Ga* in two different *Ga-RNAi* silenced hairy roots (A) *Ga-RNAi* targeted to the switch region and (B) *Ga-RNAi* targeted to the C-terminal region was measured by real-time quantitative PCR. Fold change represents expression of specific genes in transgenic hairy roots in comparison to empty vector (EV) containing roots, which was set as 1. Data are representative of three independent experiments and are normalized by the reference gene *Actin*. Data are average of two biological replicates each with three different experiments. Error bars represent  $\pm$  SE. Asterisks (\*) indicate statistically significant differences compared to empty vector control (\* =  $P < 0.05$ ; Student's *t* test).

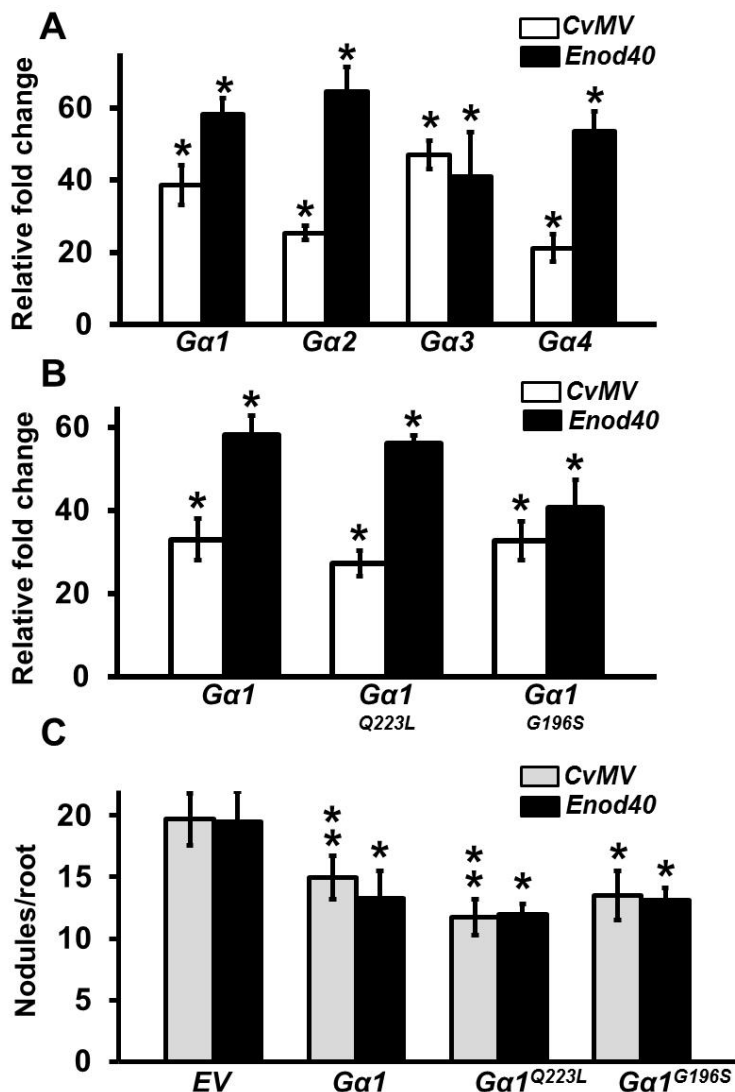

**Supplemental Figure 3. Transcript levels of soybean *Ga* genes in *Ga*-overexpressing hairy roots and nodulation phenotypes.** Hairy roots of soybean were collected from specific *Ga* over-expression lines at 32 dpi with *B. japonicum*. (A) Expression level of *Ga* genes (1-4) driven by *CvMV* and *Enod40* promoters. (B) Expression level of native and mutant versions of *Ga1* driven by *CvMV* and *Enod40* promoter. Fold change was determined by comparing the transcript levels of specific genes in overexpression lines to their expression in EV control lines. Data are representative of three independent experiments and are normalized by the reference gene *Actin*. Error

bars represent  $\pm$  SE. Asterisks (\*) in both A and B indicate statistically significant differences compared to empty vector control (\* =  $P < 0.05$ ; Student's *t* test). (C) Nodulation phenotype of transgenic soybean hairy roots expressing native *Ga1*, constitutively active form of *Ga1* (*Ga1*<sup>Q223L</sup>) and RGS uncoupler form of *Ga1* (*Ga1*<sup>G196S</sup>) driven by *CvMV* or *Enod40* promoters. Nodule numbers on transgenic hairy roots was counted at 32 dpi with *B. japonicum* and were compared with their respective empty vector (EV) transformed hairy roots. The data represent average of 3 biological replicates (>40 individual plants/biological replicate containing transgenic nodulated roots). Asterisks (\*) indicate statistically significant differences compared to empty vector control (\* =  $P < 0.05$ ; \*\* =  $P < 0.01$ ; Mann-Whitney *U* test).

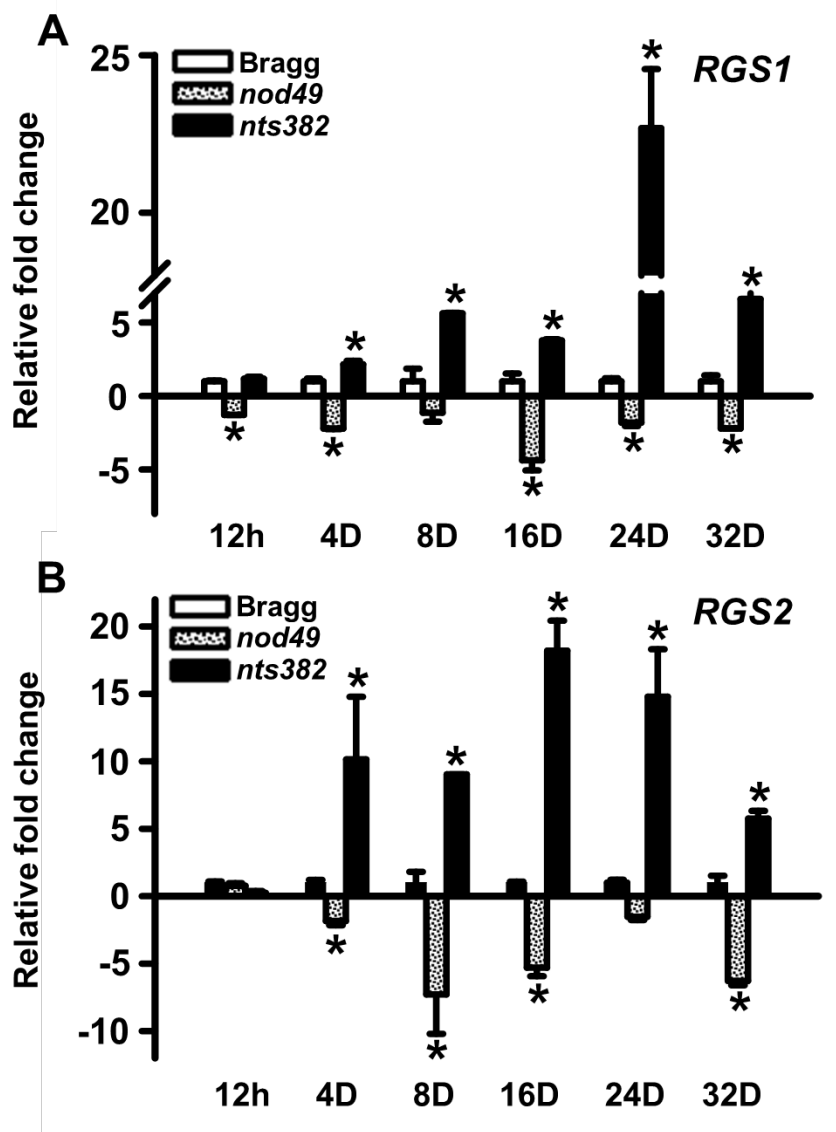

**Supplemental Figure 4. *B. japonicum*-induced expression of soybean *RGS1* and *RGS2* in wild type, non-nodulating and super-nodulating soybean hairy roots at different time points.** Relative fold changes of (A) *RGS1* and (B) *RGS2* were determined in Bragg (wild-type), *nod49* (non-nodulating) and *nts382* (super-nodulating) soybean hairy roots by real-time PCR after 12 hour (12h), 4 day (4D), 8 day (8D), 16 day (16D), 24 day (24D) and 32 day (32D) post inoculation with *B. japonicum*. Data are normalized by the reference gene *Actin* and 3 biological replicates of three different experiments were used. Error bars represent  $\pm$  SE. Expression in wild-type Bragg was set at 1. Asterisks (\*) represent statistically significant differences compared to empty vector control (\* =  $P < 0.05$ ; Student's *t* test).

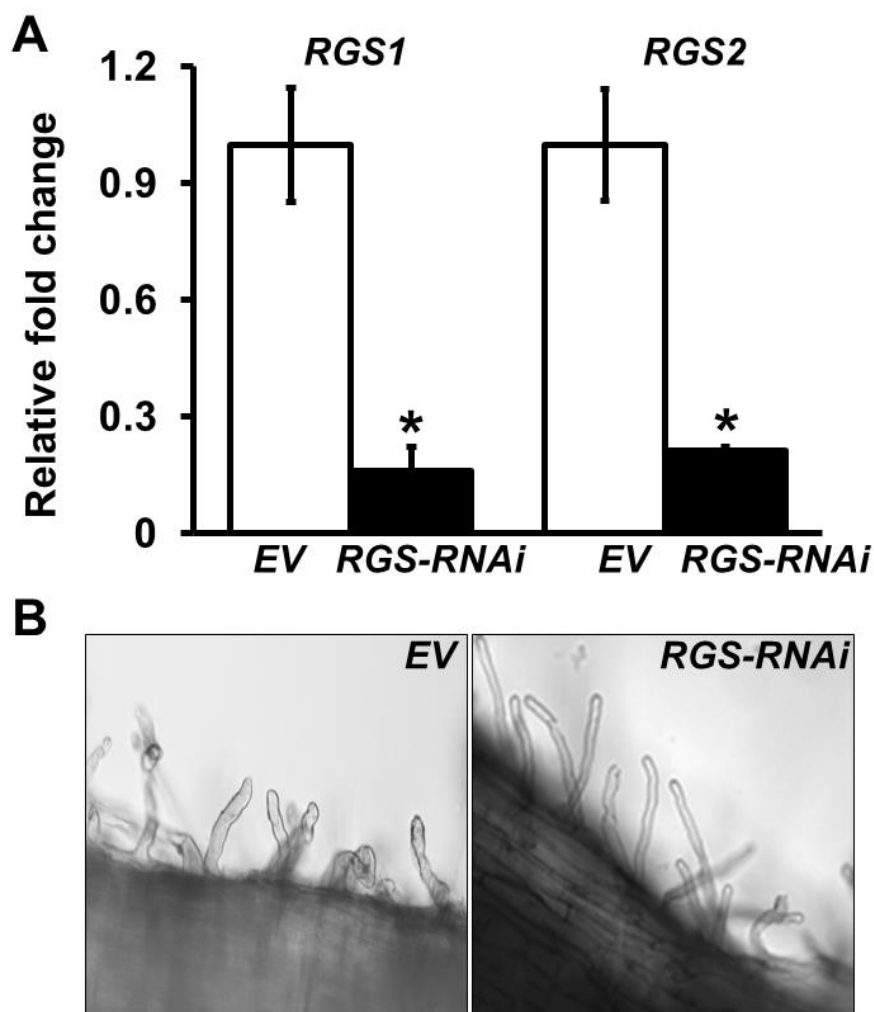

**Supplemental Figure 5. Study of expression levels of *RGS* genes and root hair deformation in *RGS-RNAi* silenced transgenic hairy roots.** (A) Hairy roots of soybean were collected from *RGS-RNAi* lines 32 dpi with *B. japonicum*. Expression of *RGS1* and *RGS2* in *RGS-RNAi* silenced hairy roots were measured by real-time quantitative PCR. Fold change represents expression of genes in transgenic lines in comparison to their expression in empty vector (EV) containing roots, which was set as 1. Data are representative of three independent experiments and are normalized by the reference gene *Actin*. Data are average from two biological replicates of three different experiments. Error bars represent  $\pm$  SE. Asterisks (\*) indicate statistically significant differences compared to empty vector control (\* =  $P < 0.05$ ; Student's *t* test). (B) Microscopic view of *RGS-RNAi* and EV transformed root hairs at 4 days after inoculation with *B. japonicum*. Representative images captured from 10-12 different hairy roots of 3 independent experiments are shown.

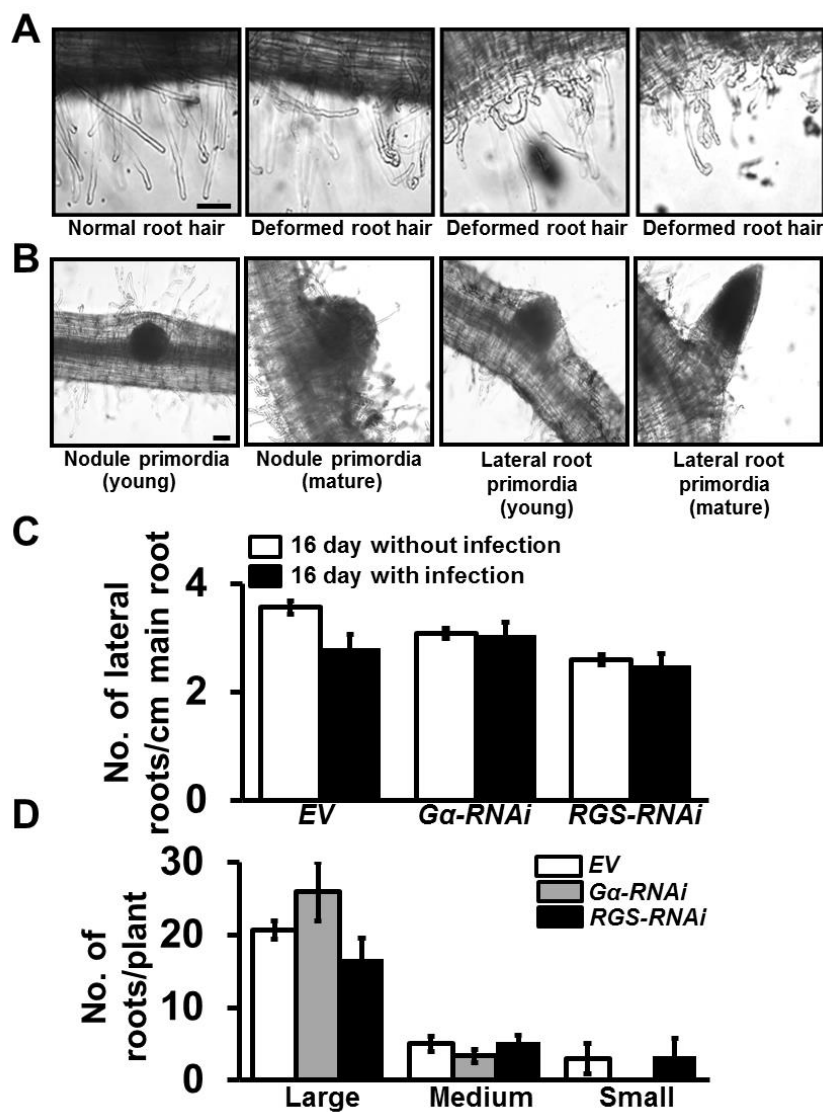

**Supplemental Figure 6. Phenotypes of root hairs, lateral root primordia, nodule primordia and roots in *Gα-RNAi* and *RGS-RNAi* transgenic lines.** (A) Images of normal and deformed root hairs on soybean hairy roots. Microscopic view of representative root hair deformations observed at 4 days after inoculation with *B. japonicum* is shown. Bar = 100 μm. (B) Images of nodule primordia and lateral root primordia on soybean hairy roots. Microscopic view of representative nodule primordia and lateral root primordia developing on

transgenic hairy roots is shown. Bar = 500 μm. (C) Quantification of lateral root numbers in soybean *Gα-RNAi* and *RGS-RNAi* transgenic lines. Measurement of lateral root numbers at 16 days after inoculation with *B. japonicum* or without infection. Data are representative of three independent experiments. Error bars represent ± SE. EV (empty vector). (D) Quantification of different sized roots in soybean *Gα-RNAi* and *RGS-RNAi* transgenic lines. Hairy roots were measured and grouped into three different size bins (large > 5 cm, medium = 2.5 cm to 5 cm and small < 2.5 cm) at 32 days after inoculation with *B. japonicum*. Data are representative of three independent experiments. Error bars represent ± SE.

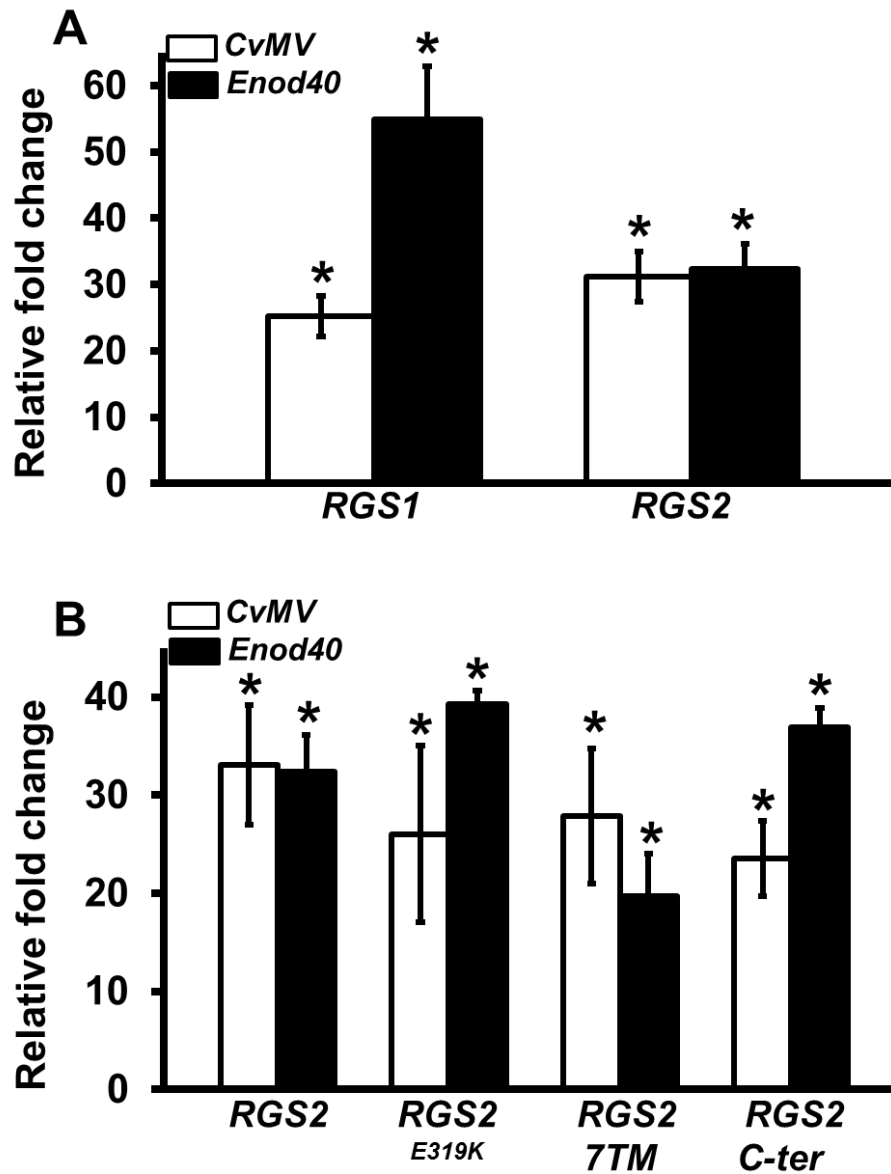

**Supplemental Figure 7. Expression levels of RGS genes in RGS-overexpressing transgenic hairy roots.** Hairy roots of soybean were collected from *RGS1* and *RGS2* over-expression lines at 32 dpi with *B. japonicum*. (A) Expression level of *RGS1* and *RGS2* driven by both *CvMV* and *Enod40* promoter. (B) Expression level of native and mutant versions of *RGS2* driven by both *CvMV* and *Enod40* promoter. Fold change was determined by comparing the transcript levels of specific genes in overexpression lines to their expression in EV control lines. Data are representative of three independent experiments and are normalized by the reference gene *Actin*. Error bars represent  $\pm$  SE. Asterisks (\*) indicate statistically significant differences compared to empty vector control (\* =  $P < 0.05$ ; Student's *t* test).

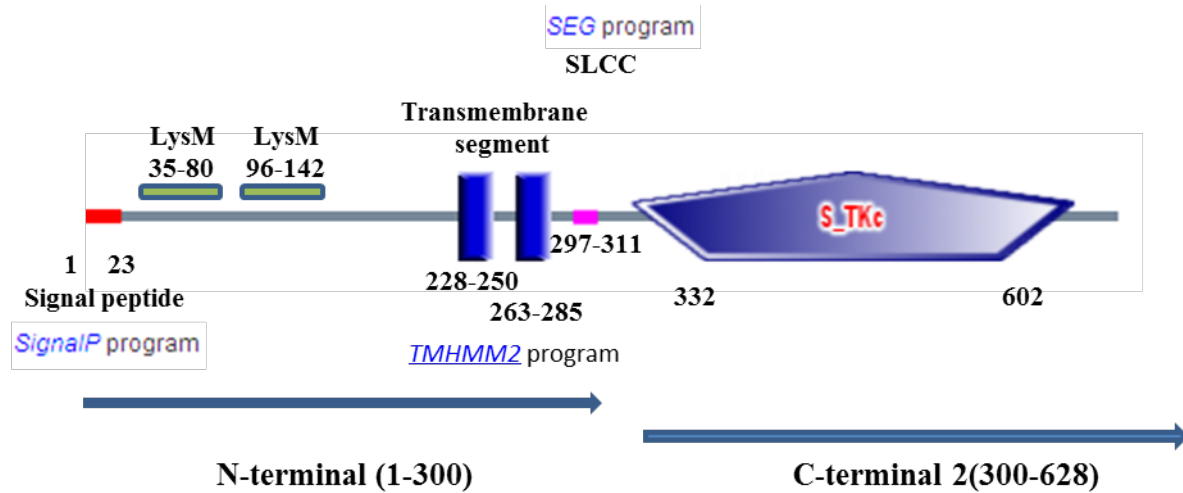

**Supplemental Figure 8. Domain architecture of soybean NFR1 $\alpha$ .** Soybean NFR1 $\alpha$  has a signal peptide, two LysM motifs and two transmembrane domain at N-terminal regions and it contains a serine-threonine kinase domain at its C-terminal region.



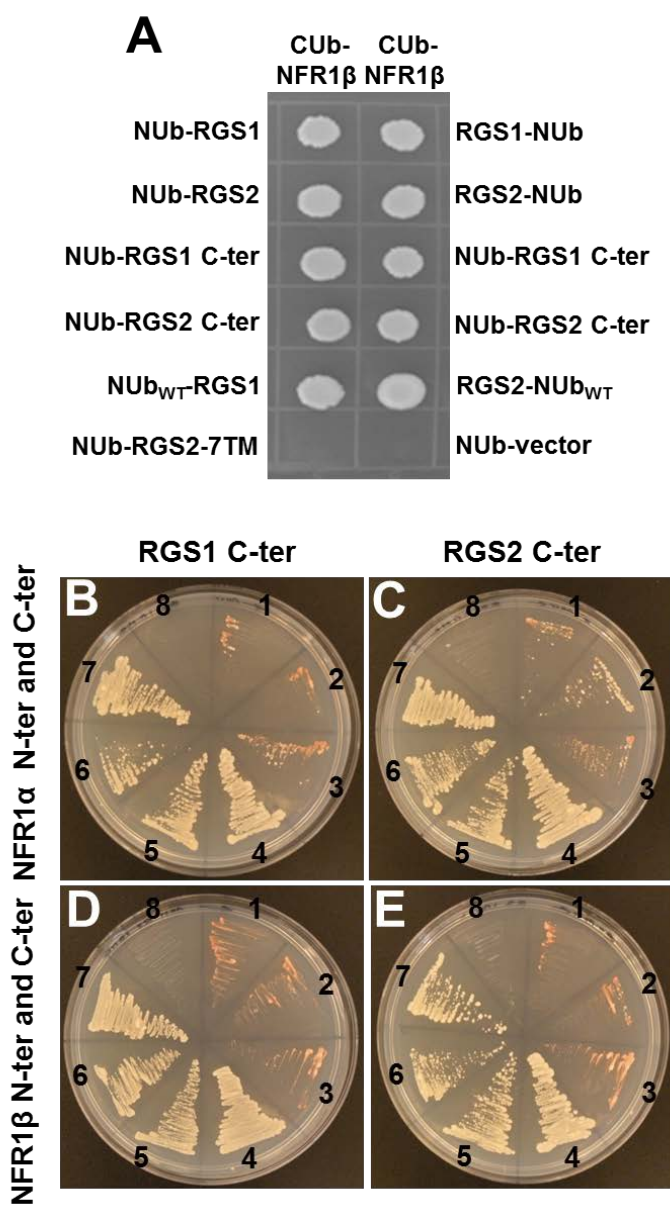

**Supplemental Figure 9.**  
**Interaction between soybean RGS1 and RGS2 with NFR1 $\alpha$  and NFR1 $\beta$  using split ubiquitin-based interaction assay.**

(A) The picture shows yeast growth on selective media with 200  $\mu$ M methionine. In all cases, full-length RGS, the N-terminal 7 transmembrane region (7TM) and the C-terminus RGS domain containing RGS were used as NUb fusions in both orientations (NUb-RGS denoting NUb fused to the N terminus of RGS and RGS-NUb denoting NUb fused to the C terminus of RGS). NFR1 $\beta$  was used as CUb fusion. NUbwT fusion and NUb-vector fusion constructs were used as positive and negative controls, respectively. Two biological replicates of the experiment were performed with identical results. (B) and (C), Interaction between NFR1 $\alpha$  N- and C-terminal with RGS1 and RGS2 C-terminal; (D) and (E), Interaction between NFR1 $\beta$  N- and C-terminal with RGS1 and RGS2 C-terminal.

Two biological replicates of the experiment were performed with identical results. In all cases RGS was used as NUb fusions in both orientations (NUb-RGS; N-terminal of ubiquitin fused at the N-terminal of RGS and RGS-NUb; N-terminal of ubiquitin fused at the C-terminal of RGS) and NFR1 was used as CUb fusion (NFR1 $\alpha$ /NFR1 $\beta$ -CUb). NUbwT fusion and NUb-vector fusions constructs were used as positive and negative controls, respectively. The interaction combinations are: (1) NFR1 N-terminal-CUb + RGS-NUb; (2) NFR1 N-terminal-CUb + NUb-RGS; (3) NFR1 N-terminal-CUb + RGS-NUbwT; (4) NFR1 N-terminal-CUb + NubwT-RGS; (5) NFR1 C-terminal-CUb + RGS-NUb; (6) NFR1 C-terminal-CUb + NUb-RGS; (7) NFR1 C-terminal-CUb + RGS-NUbwT (positive control); (8) NFR1 C-terminal-CUb + NUb-vector (negative control).

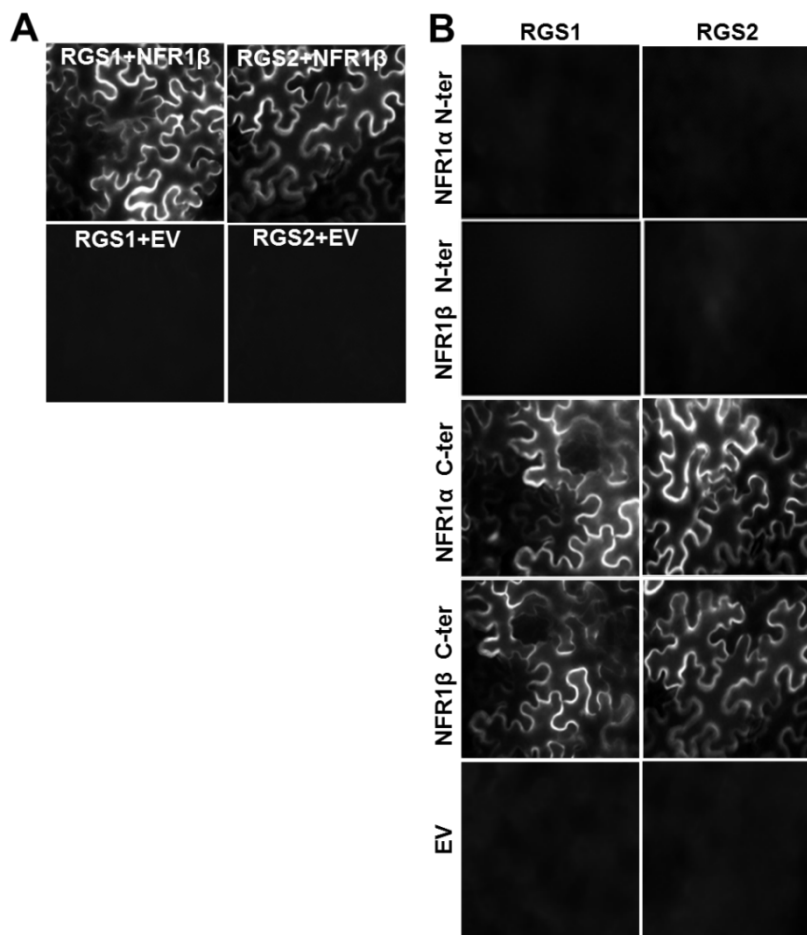

**Supplemental Figure 10. Interaction between RGS (in 77-nEYFP-N1) and NFR1 (in 78-cEYFP-N1) using bimolecular fluorescence complementation assay.** Agrobacteria containing different combination of soybean RGS1 and RGS2 and NFR1 ( $\alpha$ ,  $\beta$ ) were infiltrated in tobacco leaves and reconstitution of YFP fluorescence due to protein-protein interaction was recorded. Infiltrated plants were incubated in darkness for 24 h followed by 36 h incubation in light. The leaves were observed under Nikon Eclipse E800 microscope with epi-fluorescent modules for YFP fluorescence detection. At least five independent infiltrations were performed for each construct. (A) Interaction between full-length RGS with NFR1 $\beta$  using bimolecular fluorescence complementation assay. (B) Interaction between full-length RGS with N- and C-terminal NFR1 using bimolecular fluorescence complementation assay. The interaction combinations are: RGS1/RGS2+NFR1 $\alpha$  N-terminal, RGS1/RGS2+NFR1 $\beta$  N-terminal, RGS1/RGS2+NFR1 $\alpha$  C-terminal, RGS1/RGS2+NFR1 $\beta$  C-terminal, RGS1/RGS2 + EV. Interaction between soybean RGS1 and RGS2 with empty vector were used as negative controls.

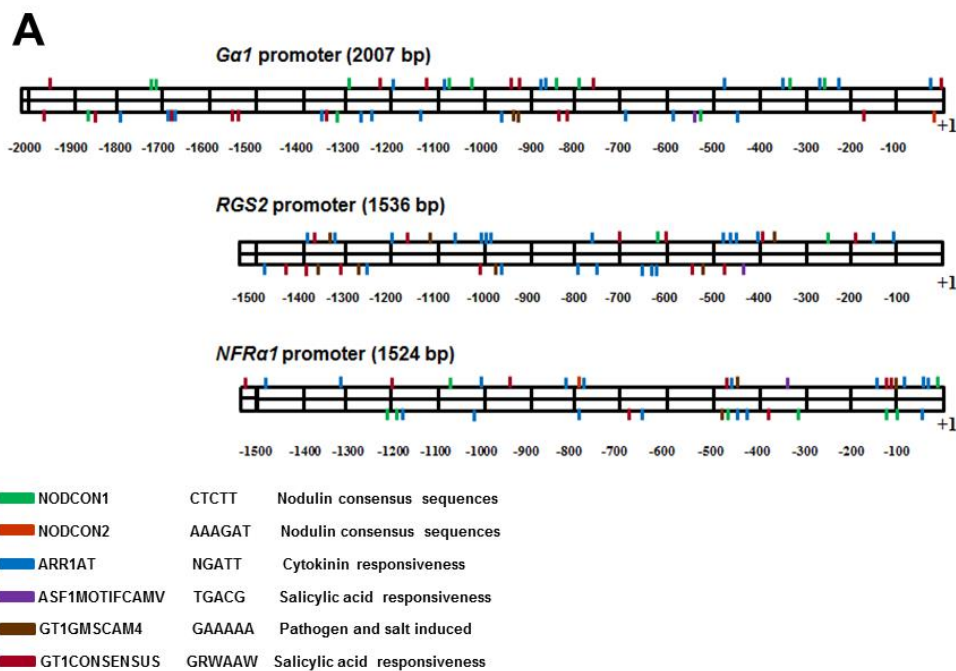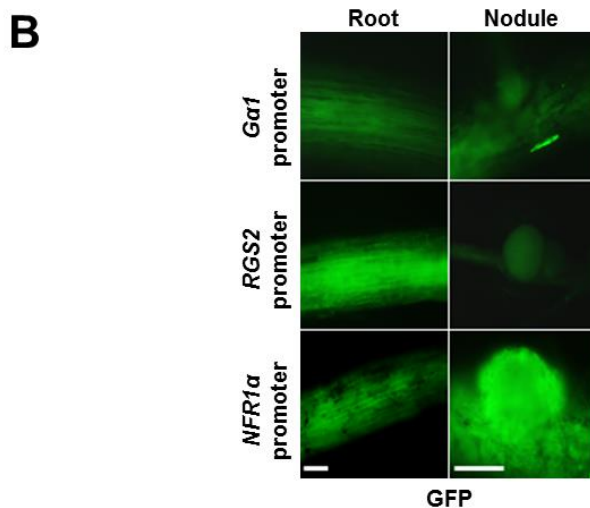

**Supplemental Figure 11. Analysis of promoter of *Ga1*, *RGS2* and *NFR1 $\alpha$* .** (A) The cis-elements within the promoter of *Ga1* (~2 Kb), *RGS2* (~1.5 Kb) and *NFR1 $\alpha$*  (~1.5 Kb) were identifying using PLACE database (K. Higo, Y. Ugawa, M. Iwamoto and T. Korenaga (1999) Plant cis-acting regulatory DNA elements (PLACE) database: 1999. Nucleic Acids Research Vol. 27 No.1 pp. 297-300.). (<http://www.dna.affrc.go.jp/PLACE/>). (B) The constructs containing the pro *Ga1*:GFP, pro *RGS2*:GFP and pro *NFR1 $\alpha$* :GFP were transformed using the hairy root transformation system and detection of GFP fluorescence was observed 10 days after *B. japonicum* infection in hairy roots and 24 days after infection in nodules. Bar = 150  $\mu$ m and 1 mm for hairy roots and nodules, respectively.

**A** NFR1 $\alpha$  C-terminal (minimum localization 99%)

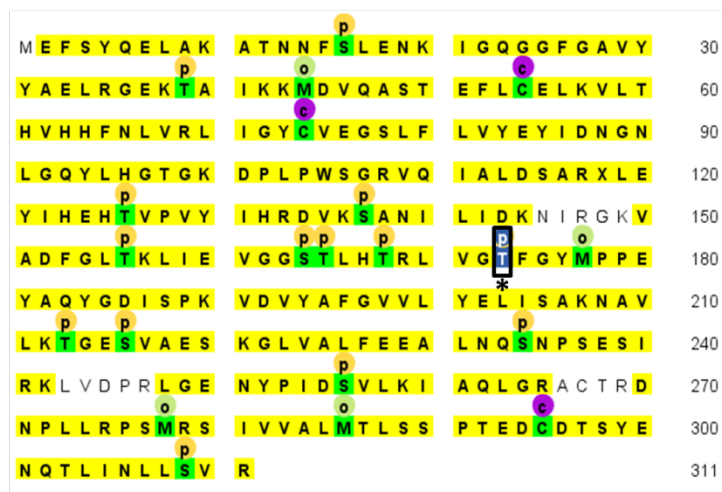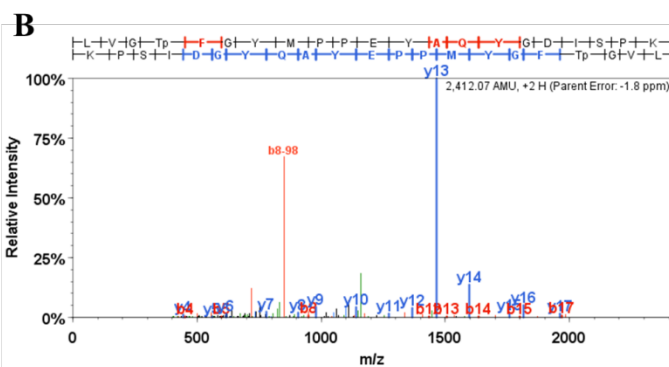

**Supplemental Figure 12. Detection of phosphorylated amino acid residues in NFR1 $\alpha$  C-terminal kinase domain by LC-MS/MS after *in vitro* phosphorylation assay.** (A) Kinase C-terminal protein sequence identified with 95% coverage (highlighted in yellow) using a peptide probability threshold of 80% calculated according to the Peptide Prophet algorithm. Phosphorylation modifications of serine and threonine residues were identified as indicated in the figure [p]. Other experimental modifications (oxidation of methionine and carbamidomethylation of cysteine) are also shown in the figure although not relevant here. The localization probability of the phosphorylation sites was further tested using Scaffold PTM (v2.1.2.1 Proteome Software). The threshold was set to 95% localization probability. The most important phosphorylation residue within the activation loop is indicated by \* sign. (B) The figure shows the fragmentation profile of one specific peptide identified as LVGTpFGYMPPEYAQYGDISP K with a phosphorylation site at threonine 173 (C-terminal region, corresponds to threonine 473 residue in full-length protein) and localization probability of 100. The y and b ions coverage as shown in the figure is evidence that the phosphorylation of the phosphopeptide is located on the threonine.

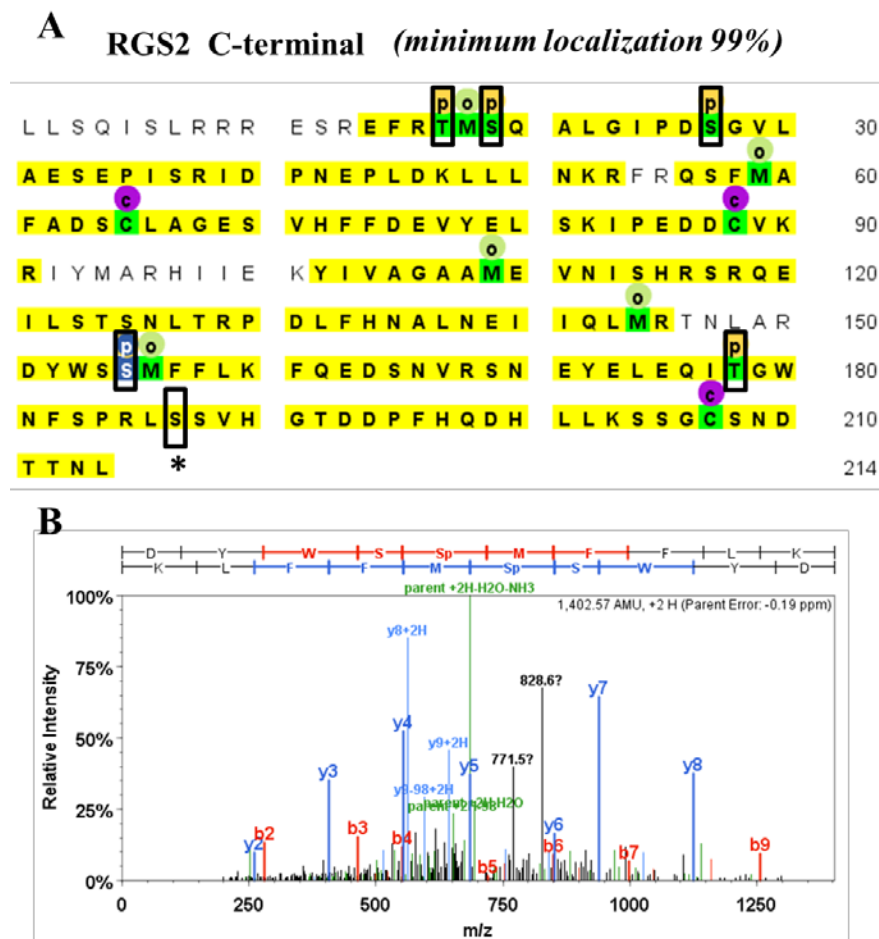

**Supplemental Figure 13. Detection of phosphorylated amino acid residues in RGS2 C-terminal region by LC-MS/MS after *in vitro* phosphorylation assay.** (A) The figure shows the RGS2 C-terminal protein sequence identified with 95% coverage (highlighted in yellow) using a peptide probability threshold of 80% calculated according to the Peptide Prophet algorithm. Phosphorylation modifications of serine and threonine residues were identified as indicated in the figure **p**. Other experimental modifications (oxidation of methionine and carbamidomethylation of cysteine) are also shown in the figure although not relevant here. The localization probability of the phosphorylation sites was further tested using Scaffold PTM (v2.1.2.1 Proteome Software). The threshold was set to 95% localization probability. Another important phosphorylation residue is indicated by \* sign and this residue were detected when the threshold was set to 80% localization probability. (B) The figure shows the fragmentation profile of one specific peptide identified as DYWS**p**MFFLK with a phosphorylation site at serine 155 in C terminal region (corresponds to serine 405 in full-length protein) and localization probability of 100. The y and b ions coverage as shown in the figure is evidence that the phosphorylation of the phosphopeptide is located on the serine.

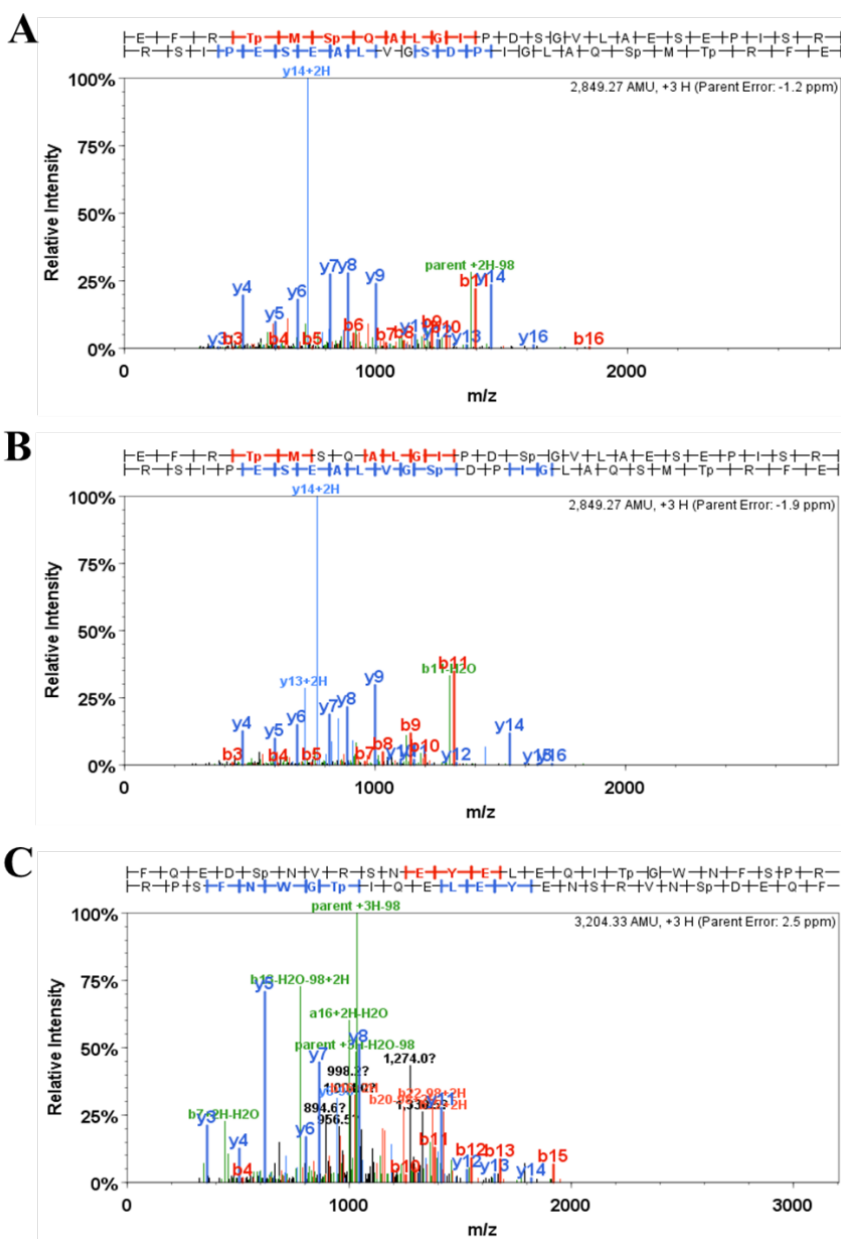

**Supplemental Figure 14. Detection of phosphorylation sites within soybean RGS2 C-terminal region by LC-MS/MS after *in vitro* phosphorylation assay.** (A) The figure shows the fragmentation profile of one specific peptide identified as EFRT**p**M**S**pQALGIPDS GVLAESEPISR with a phosphorylation site at threonine 17 and serine 19 in C terminal region (correspond to threonine 267 and serine 269 residue in full-length protein) and localization probability of 100. (B) The figure shows the fragmentation profile of one specific peptide identified as EFRT**p**M**S**QALGIPDS**p** GVLAESEPISR with a phosphorylation site at

serine 27 in C terminal region (corresponds to serine 277 residue in full-length protein) and localization probability of 100. (C) The figure shows the fragmentation profile of one specific peptide identified as FQED**S**pN**V**R**S**NE**Y**EL**Q**I**T****p**GW**N**F**S**PR with a phosphorylation site at threonine 178 in C terminal region (corresponds to threonine 437 in full-length protein) and localization probability of 100. In all cases, the y and b ions coverage as shown in the figures is evidence that the phosphorylation of the phosphopeptide is located on either serine/threonine.



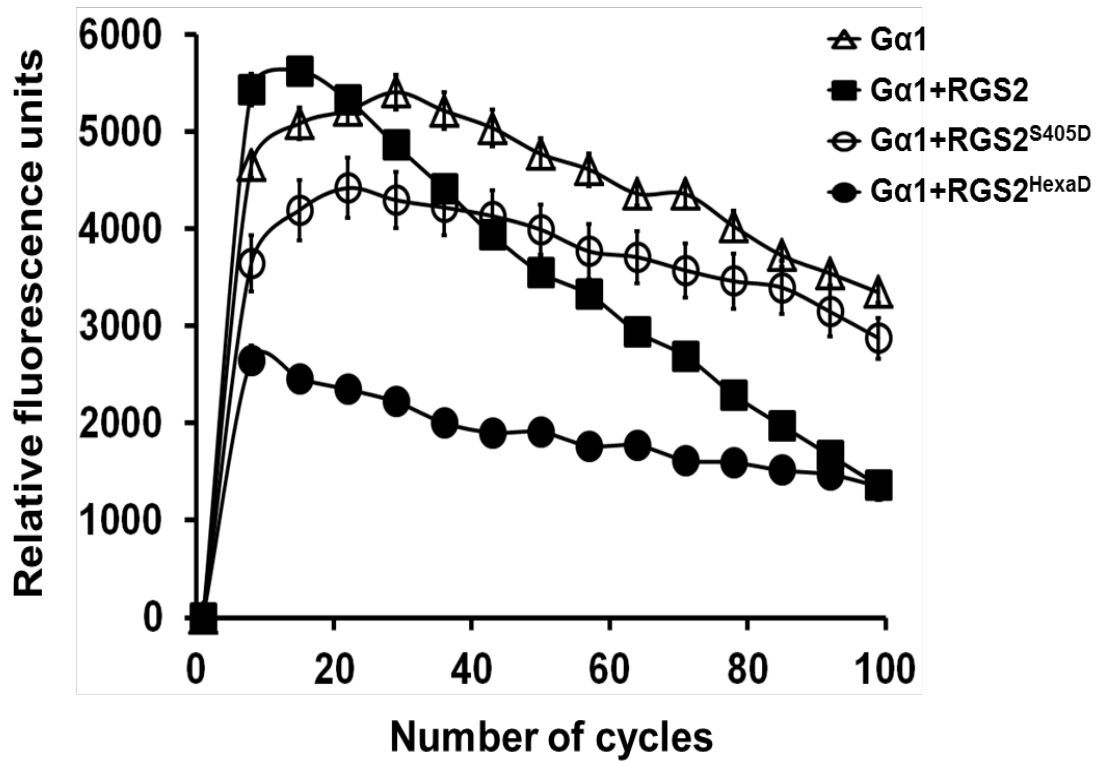

**Supplemental Figure 15. Changes of GTPase activity of Gα1 in the presence of different mutant versions of RGS2.** GTP hydrolysis was measured using GTP-BODIPY-FL in real time fluorescence assays. GTPase activity of Gα1 was measured in absence or presence of purified recombinant C-terminal native and mutant RGS2. Data are one of two independent experiments, each with three replicates, mean ± S.E.

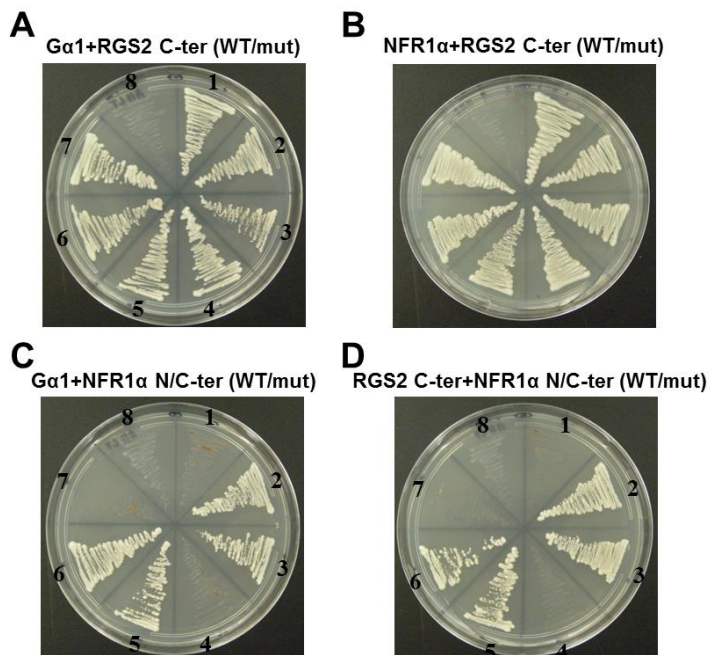

**Supplemental Figure 16.** Interaction between Gα1 with wild type and mutant RGS2 and NFR1α using split ubiquitin-based interaction assay. (A) C-terminal RGS2 was used as CUB fusion (RGS2-CUB) and Gα1 was used as NUB fusions in both orientations (NUb-Gα; N-terminal of ubiquitin fused at the N terminal of Gα and Gα-NUb; N-terminal of ubiquitin fused at the C-terminal of Gα). NUBwt fusion constructs were used as positive controls for interaction and NUB-vector

fusions were used as negative controls. The interaction combinations are: (1) C-terminal RGS2-CUB + Gα1-NUb; (2) C-terminal RGS2<sup>S405A</sup>-CUB + Gα1-NUb; (3) C-terminal RGS2<sup>HexaA</sup>-CUB + Gα1-NUb; (4) C-terminal RGS2-CUB + NUB-Gα1; (5) C-terminal RGS2<sup>S405A</sup>-CUB + NUB-Gα1; (6) C-terminal RGS2<sup>HexaA</sup>-CUB + NUB-Gα1; (7) C-terminal RGS2-CUB + NUBwt-Gα1 (positive control) and (8) C-terminal RGS2-CUB+NUb-vector (negative control). (B) C-terminal RGS2 was used as CUB fusion (RGS2-CUB) and NFR1α was used as NUB fusion in both orientations. The interaction combinations are: (1) C-terminal RGS2-CUB + NFR1α-NUb; (2) C-terminal RGS2<sup>S405A</sup>-CUB + NFR1α-NUb; (3) C-terminal RGS2<sup>HexaA</sup>-CUB + NFR1α-NUb; (4) C-terminal RGS2-CUB + NUB-NFR1α; (5) C-terminal RGS2<sup>S405A</sup>-CUB + NUB-NFR1α; (6) C-terminal RGS2<sup>HexaA</sup>-CUB + NUB-NFR1α; (7) C-terminal RGS2-CUB + NUBwt-NFR1α (positive control) and (8) C-terminal RGS2-CUB+NUb-vector (negative control). (C) NFR1α was used as CUB fusion (NFR1α-CUB) and Gα1 was used as NUB fusion in both orientations. The interaction combinations are: (1) NFR1α N-terminal-CUB + Gα1-NUb; (2) NFR1α C-terminal-CUB + Gα1-NUb; (3) NFR1α C-terminal<sup>T473A</sup>-CUB + Gα1-NUb; (4) NFR1α N-terminal-CUB + NUB-Gα1; (5) NFR1α C-terminal-CUB+NUb-Gα1; (6) NFR1α C-terminal<sup>T473A</sup>-CUB +NUb-Gα1; (7) NFR1α N-terminal-CUB + NUB-vector (negative control) and (8) NFR1α C-terminal-CUB + NUB-vector (negative control). (D) NFR1α was used as CUB fusion (NFR1α-CUB) and C-terminal RGS2 was used as NUB fusion in both orientations. The interaction combinations are: (1) NFR1α N-terminal-CUB + C-terminal RGS2-NUb; (2) NFR1α C-terminal-CUB + C-terminal RGS2-NUb; (3) NFR1α C-terminal<sup>T473A</sup>-CUB + C-terminal RGS2-NUb; (4) NFR1α N-terminal-CUB + NUB-C-terminal RGS2; (5) NFR1α C-terminal-CUB + NUB-C-terminal RGS2; (6) NFR1α C-terminal<sup>T473A</sup>-CUB + NUB- C-terminal RGS2; (7) NFR1α N-terminal-CUB + NUB-vector (negative control) and (8) NFR1α C-terminal-CUB + NUB-vector (negative control). In all cases two biological replicates of the experiment were performed with identical results. The picture shows yeast growth on selective media with 200 μM methionine.



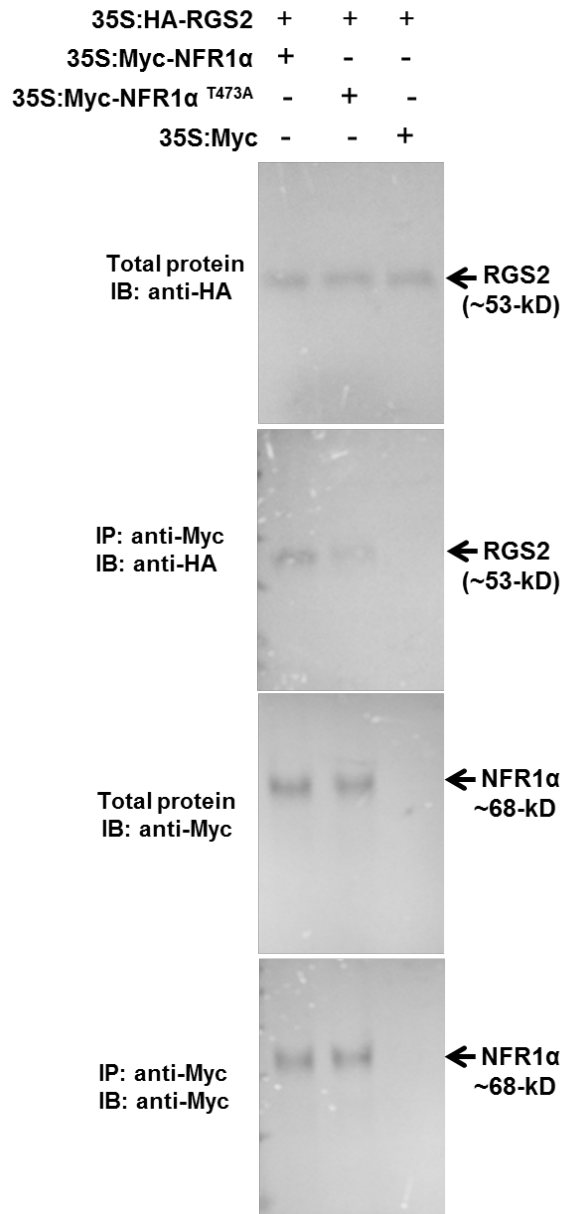

**Supplemental Figure 17. Myc-tagged wild type NFR1 $\alpha$  and mutant NFR1 $\alpha$ <sup>T473A</sup> associate with soybean RGS2 *in vivo*.** Total proteins were extracted from tobacco leaves infiltrated with 35S:HA-RGS2, 35S:Myc-NFR1 $\alpha$ , 35S:Myc-NFR1 $\alpha$ <sup>T473A</sup> and 35S:Myc-tagged empty vector in different combinations. Anti-Myc antibody was used for immunoprecipitation, and the total extracts and precipitates were further immunoblotted with HA and Myc antibodies to detect the RGS2 and NFR1 $\alpha$ .

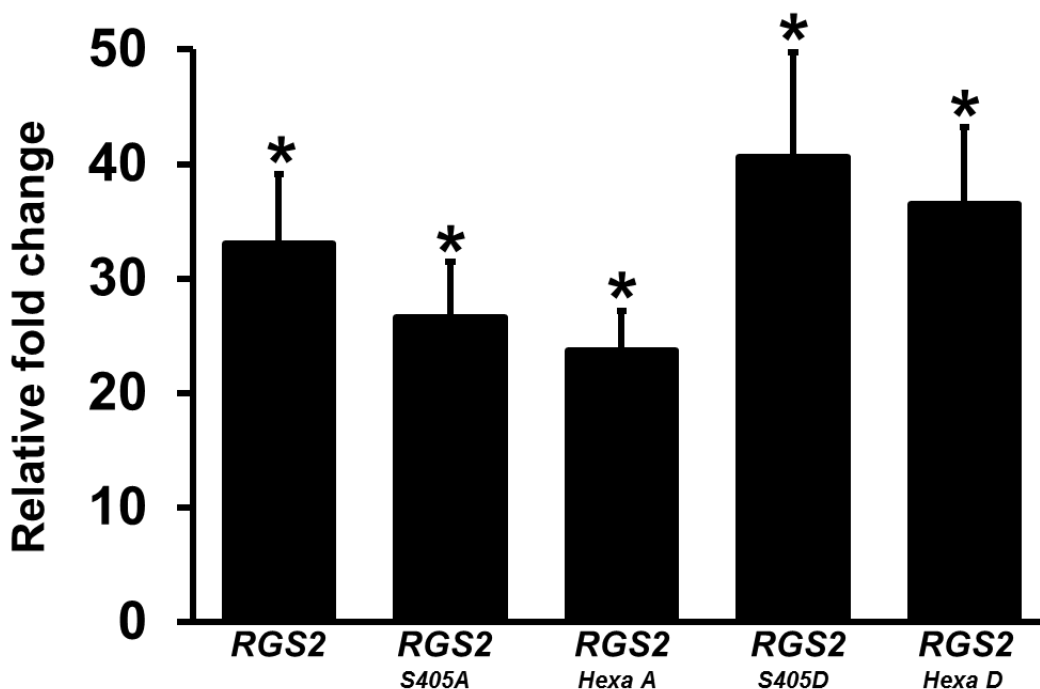

**Supplemental Figure 18. Transcript level of soybean RGS2 in native and mutant RGS-overexpressing hairy roots.** Hairy roots of soybean were collected from specific RGS-overexpression lines 32 days after inoculation with *B. japonicum*. Expression of RGS2 driven by both *CvMV* and *Enod40* promoter were measured by real-time quantitative PCR. Fold change represents expression of genes in transgenic lines in comparison to their expression in empty vector (EV) containing roots, which was set as 1. Data are representative of three independent experiments and are normalized by the reference gene *Actin*. Error bars represent  $\pm$  SE. Asterisks (\*) indicate statistically significant differences compared to empty vector control (\* =  $P < 0.05$ ; Student's *t* test).

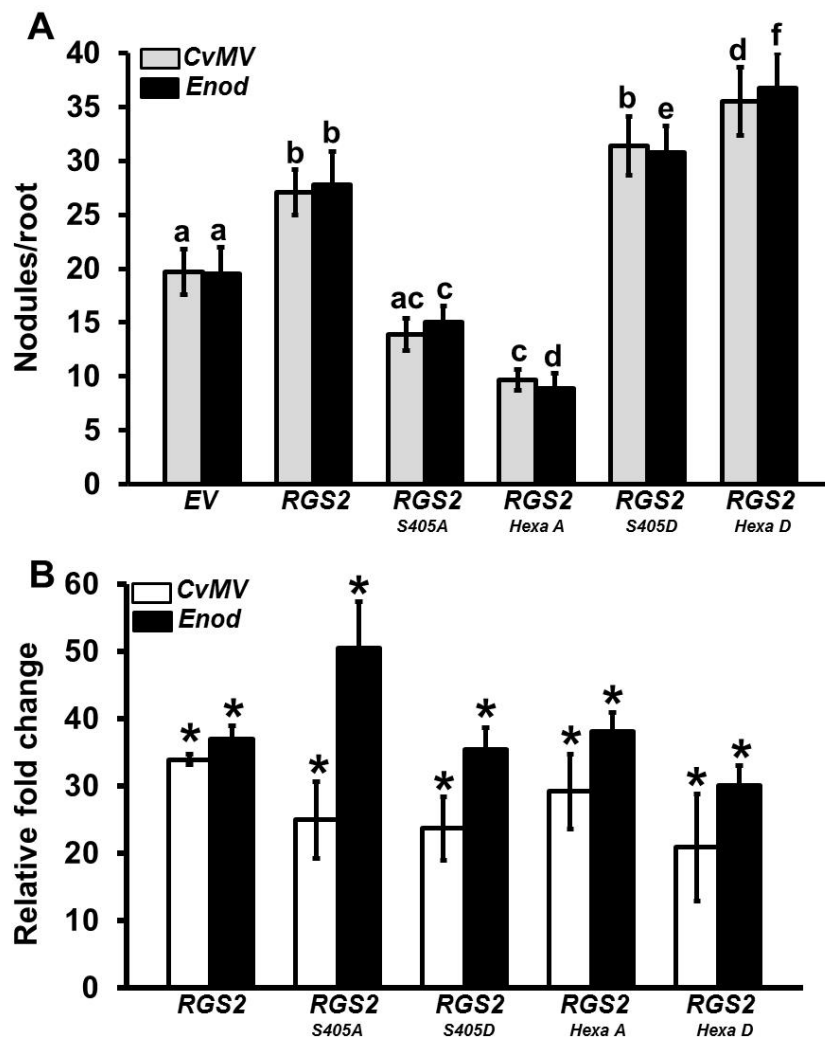

**Supplemental Figure 19. Nodule formation on transgenic soybean hairy roots over-expressing phospho-dead and phospho-mimic versions of C-terminal RGS2.** (A) Native *RGS2*, single mutant phospho-dead and phospho-mimic versions (*RGS2*<sup>S405A</sup> and *RGS2*<sup>S405D</sup>) and hexa mutant phospho-dead and phospho-mimic versions (*RGS2*<sup>HexaA</sup> and *RGS2*<sup>HexaD</sup>) of C-terminal *RGS2* driven by *CvMV* and *Enod40* promoter were used for hairy root transformation. Nodule number in over-expression roots was counted at 32 dpi with *B. japonicum* and compared with the empty vector

containing hairy roots. The data represent average of 3 biological replicates (40-50 individual plants/biological replicate) containing transgenic nodulated roots. Different letters indicate a significant difference (Dunn's multiple comparisons test,  $P < 0.05$ ) (B) Transcript level of soybean *RGS2* in native and mutant *RGS*-overexpressing hairy roots. Hairy roots of soybean were collected from specific *RGS*-overexpression lines 32 days after inoculation with *B. japonicum*. Expression of *RGS2* driven by both *CvMV* and *Enod40* promoter were measured by real-time quantitative PCR. Fold change represents expression of genes in transgenic lines in comparison to their expression in empty vector (EV) containing roots, which was set as 1. Data are representative of three independent experiments and are normalized by the reference gene *Actin*. Error bars represent  $\pm$  SE. Asterisks (\*) indicate statistically significant differences compared to empty vector control (\* =  $P < 0.05$ ; Student's *t* test).

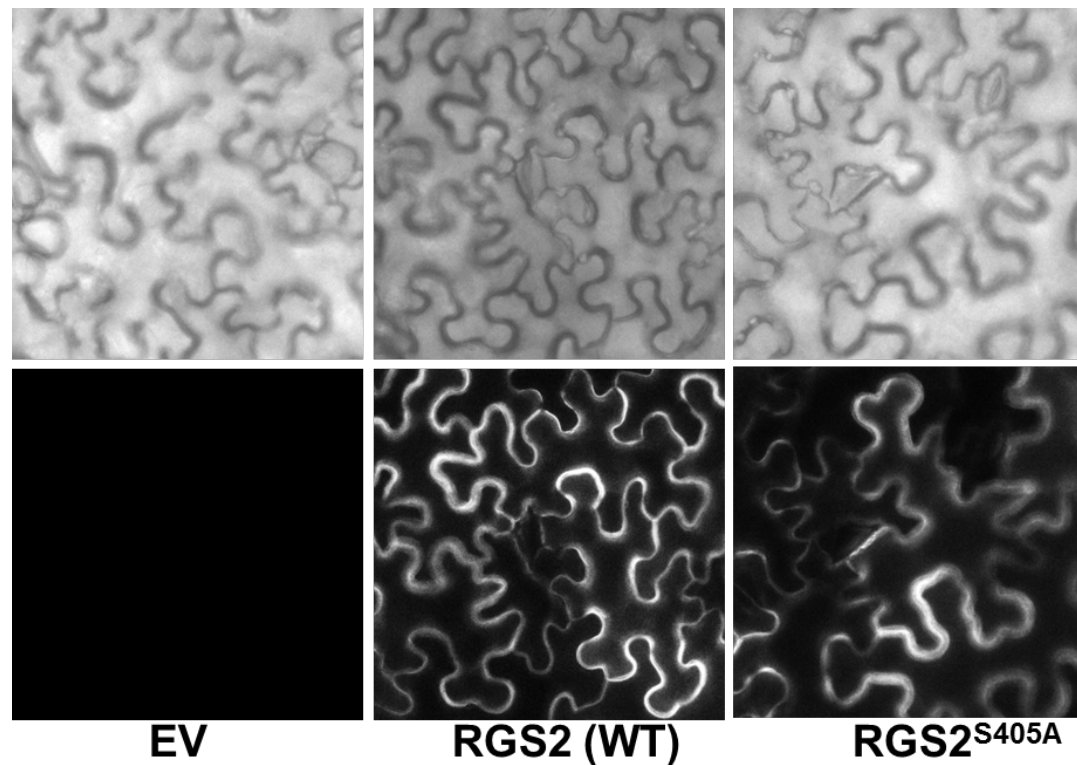

**Supplemental Figure 20. Localization of native and mutant RGS2.** Native *YFP-RGS2* and *YFP-RGS2<sup>S405A</sup>* mutant protein both localize to the cell periphery in transiently transformed tobacco leaves. At least six independent transformations were performed. The figure shows representative picture from one transformation. Empty vector was used as negative control. Upper panel: bright field images of the represented leaves.

Supplemental Table 1. Primers used in experiments described in the manuscript.

|                                                |                                                                                    |
|------------------------------------------------|------------------------------------------------------------------------------------|
| <b>Gene expression:</b>                        |                                                                                    |
| Gα1 RT FP                                      | CTCCAAGTTCCAGATTGTGCC                                                              |
| Gα1 RT RP                                      | TCAAACATGGTTGCCTTAGGAC                                                             |
| Gα2 RT FP                                      | TTCAGGAGACATATGCCCGA                                                               |
| Gα2 RT RP                                      | GGATCCACTCGAAAAGTTCCTTG                                                            |
| Gα3 RT FP                                      | AATTTGCAAAGGCTGTCTGACA                                                             |
| Gα3 RT RP                                      | ACTCGAAAAGTTCCTTAGTCTCGG                                                           |
| Gα4 RT FP                                      | AGCTTGACACAGGAAATAGAGAGA                                                           |
| Gα4 RT RP                                      | CCATTTTCTCCTCTCATTCTCTGA                                                           |
| RGS1 RT FP                                     | ATACCTGAAGATGACTGTGTGAG                                                            |
| RGS1 RT RP                                     | TGAAGACCAGTAATCTCGAGCT                                                             |
| RGS2 RT FP                                     | TAAAATACCTGAAGATGACTGTGTTAA                                                        |
| RGS2 RT RP                                     | GAAGACCAGTAATCTCGGGCC                                                              |
| NFR1α RT FP                                    | GGT GCG CTT GAT TGG ATA TT                                                         |
| NFR1α RT RP                                    | ATT CAA GGC CTC TTG CTG AA                                                         |
| ENOD40 RT FP                                   | GAA AGG GGT GTG AGA GGA GAG                                                        |
| ENOD40 RT RP                                   | CGC CAC TCA AGA AAG AAT GTT                                                        |
| NODULIN 35 RT FP                               | CAC TTC CTG ATA CCC GTG AAA                                                        |
| NODULIN 35 RT RP                               | AAA GTA AAG CGG CTT CTG AGG                                                        |
| Apyrase GS52 RT FP                             | AAG ATC TTC CCC AAA CAG GAA                                                        |
| Apyrase GS52 RT RP                             | CAA GTT CTG GTC GAA ATG GAA                                                        |
| Calmodulin-like protein RT FP                  | TCTCCCAGTCCAAGATCACC                                                               |
| Calmodulin-like protein RT RP                  | GCCGATATTTTCCCATCTCC                                                               |
| <b>Split ubiquitin based Yeast two hybrid:</b> |                                                                                    |
| Gα SUS FP                                      | ACAAGTTTGTACAAAAAAGCAGGCTCTCCAACCACCA<br>TGGGCTTASTCTGYAGCAG                       |
| Gα SUS RP                                      | TCCGCCACCACCAACCACTTTGTACAAGAAAGCTGG<br>GTATAAYAAGCCAGCYTC                         |
| RGS SUS FP                                     | ACAAGTTTGTACAAAAAAGCAGGCTCTCCAACCACCA<br>TGGTGACCTGTGCCGTGAA                       |
| RGS SUS RP                                     | TCCGCCACCACCAACCACTTTGTACAAGAAAGCTGG<br>GTATAAATYAGTTGTATCATTGCT                   |
| RGS 7TM SUS RP                                 | TCC GCC ACC ACC AAC CAC TTT GTA CAA GAA AGC<br>TGG GTA TGG TTG TGA ACT TGA TAT TG  |
| RGS C-terminal SUS FP                          | ACA AGT TTG TAC AAA AAA GCA GGC TCT CCA ACC<br>ACC CTT CTC TCA CAA ATC AGC TTG AGG |
| NFR1α SUS FP                                   | TCC GCC ACC ACC AAC CAC TTT GTA CAA GAA AGC<br>TGG GTA GGA TCC TGA AGT TTC ATA TTC |
| NFR1α/β N-terminal SUS RP                      | ACA AGT TTG TAC AAA AAA GCA GGC TCT CCA ACC<br>ACC TGG TAT TAT CAG CAT ATT GAG     |

**Supplemental Data. Roy Choudhury and Pandey (2015). Plant Cell**  
**10.1105/tpc.15.00517**

|                                       |                                                                                |
|---------------------------------------|--------------------------------------------------------------------------------|
| NFR1 $\alpha/\beta$ SUS RP            | ACA AGT TTG TAC AAA AAA GCA GGC TCT CCA ACC<br>ACC AGT GGG ACT GCT AGT GCT ACT |
| NFR1 $\beta$ SUS FP                   | ACA AGT TTGTACAAAAAAGCAGGCTCTCCAACCACC<br>ATGGAACTCAAAAAATGGTACTG              |
| <b>BiFC</b>                           |                                                                                |
| NFR1 $\alpha$ BiFc FP                 | CAGATCCTCGAGCATGGA ACTCAAAAAAGGG                                               |
| NFR1 $\alpha/\beta$ BiFc RP           | CAGATCGAATTCTCTCACAGACAGTAGATT                                                 |
| NFR1 $\beta$ BiFc FP                  | CAGATCCTCGAGCATGGA ACTCAAAAAATGG                                               |
| NFR1 $\alpha$ BiFc C-terminal FP      | CAGATCCTCGAGCAGTGGGACTGCTAGTGCTACT                                             |
| NFR1 $\beta$ BiFc C-terminal FP       | CAGATCCTCGAGCATGGCGTTTTCAACTCAAGAT                                             |
| RGS1/2 BiFC FP                        | TCTGCAGTCGACATGGTGACCTGTGCCGTG                                                 |
| RGS1/2 BiFC RP                        | GGTGGATCCCGGGCCTAAATYAGTTGTATCATT                                              |
| <b>Cloning and protein expression</b> |                                                                                |
| NFR1 $\alpha$ FP                      | ATGGA ACTCAAAAAAGGGTACTTG                                                      |
| NFR1 $\alpha/\beta$ RP                | ACATCTCACAGACAGTAGATTTATG                                                      |
| NFR1 $\beta$ FP                       | ATGGA ACTCAAAAAATGGTACTGT                                                      |
| NFR1 $\alpha$ NheI FP                 | ATGCGCTAGCATGGA ACTCAAAAAAGGG                                                  |
| NFR1 $\alpha/\beta$ EcoRI RP          | ATGCGAATTCTCATCTCACAGACAGTAG                                                   |
| NFR1 $\alpha$ NheI C-terminal FP      | ATGCGCTAGCAGTGGGACTGCTAGTGCT                                                   |
| NFR1 $\beta$ NheI C-terminal FP       | ATGCGCTAGCATTATGGTGGCAAATCA                                                    |
| RGS2 FP                               | ATG GTG ACC TGT GCC GTG AAA GGA G                                              |
| RGS2 7TM RP                           | TGG TTG TGA ACT TGA TAT TG                                                     |
| RGS2 RP                               | TAA ATY AGT TGT ATC ATT GCT                                                    |
| RGS2 RNAi RP                          | TAACCCACACAGCAATGGACACA                                                        |
| RGS1/2 NheI C-terminal FP             | ATTAGCTAGCCTTCTCTCACAAATCAGCTTGA                                               |
| RGS1/2 NotI C-terminal FP             | AATTAAGAATTCTCATAAATYAGTTGTATCATTG                                             |
| G $\alpha$ RNAi 1 FP                  | GAA ATT GGA GGC AGG CTG                                                        |
| G $\alpha$ RNAi 1 RP                  | TAT GTC AAA CTT GTT TAA                                                        |
| G $\alpha$ RNAi 2 FP                  | GAT GTT GGC GGC CAG AGA                                                        |
| G $\alpha$ 1 NheI FP                  | ATTAGCTAGCATGGGCTTAGTCTGCAGCAGA                                                |
| G $\alpha$ 1 EcoRI RP                 | ATTAGAATTCTCATAATAAGCCAGCTTCAAG                                                |
| <b>Site directed mutagenesis</b>      |                                                                                |
| NFR1 $\alpha$ T473A FP                | CACACTCGTCTTGTGGGAGCATTGGATACATGCCAC<br>CA                                     |
| NFR1 $\alpha$ T473A RP                | TGGTGGCATGTATCCAAATGCTCCCACAAGACGAGT<br>GTG                                    |
| NFR1 $\alpha$ T473D FP                | CACACTCGTCTTGTGGGAGATTTGGATACATGCCAC<br>CA                                     |
| NFR1 $\alpha$ T473D RP                | TGGTGGCATGTATCCAAATCTCCCACAAGACGAGTG<br>TG                                     |
| RGS2 E319K FP                         | GAT AGT TGC TTG GCT GGG AAG AGT GTG CAC<br>TTC TTT GAT                         |

**Supplemental Data. Roy Choudhury and Pandey (2015). Plant Cell**  
**10.1105/tpc.15.00517**

|               |                                                                |
|---------------|----------------------------------------------------------------|
| RGS2 E319K RP | ATC AAA GAA GTG CAC ACT CTT CCC AGC CAA GCA<br>ACT ATC         |
| RGS2 T267A FP | GAA TCC AGA GAA TTT CGC GCA ATG AGT CAG<br>GCT CTG GGC         |
| RGS2 T267A RP | GCC CAG AGC CTG ACT CAT TGC GCG AAA TTC TCT<br>GGA TTC         |
| RGS2 S269A FP | AGA GAA TTT CGC ACA ATG GCT CAG GCT CTG<br>GGC ATA CCT         |
| RGS2 S269A RP | AGG TAT GCC CAG AGC CTG AGC CAT TGT GCG<br>AAA TTC TCT         |
| RGS2 S277A FP | GCT CTG GGC ATA CCT GAT GCT GGG GTA CTA<br>GCA GAA AGT         |
| RGS2 S277A RP | ACT TTC TGC TAG TAC CCC AGC ATC AGG TAT GCC<br>CAG AGC         |
| RGS2 S405A FP | GCC CGA GAT TAC TGG TCT GCG ATG TTC TTC CTG<br>AAG TTC         |
| RGS2 S405A RP | GAA CTT CAG GAA GAA CAT CGC AGA CCA GTA ATC<br>TCG GGC         |
| RGS2 T428A FP | TAC GAG CTG GAG CAA ATA GCA GGG TGG AAC<br>TTT TCT CCA         |
| RGS2 T428A RP | TGG AGA AAA GTT CCA CCC TGC TAT TTG CTC CAG<br>CTC GTA         |
| RGS2 S437A FP | AAC TTT TCT CCA AGG TTG GCT TCT GTG CAT GGT<br>ACA GAC         |
| RGS2 S437A RP | GTC TGT ACC ATG CAC AGA AGC CAA CCT TGG<br>AGA AAA GTT         |
| RGS2 T267D FP | AGA GAA TCC AGA GAA TTT CGC GAT ATG GAT CAG<br>GCT CTG GGC ATA |
| RGS2 T267D RP | TAT GCC CAG AGC CTG ATC CAT ATC GCG AAA TTC<br>TCT GGA TTC TCT |
| RGS2 S269D FP | TCC AGA GAA TTT CGC ACA ATG GAT CAG GCT CTG<br>GGC ATA CCT GAT |
| RGS2 S269D RP | ATC AGG TAT GCC CAG AGC CTG ATC CAT TGT<br>GCG AAA TTC TCT GGA |
| RGS2 S277D FP | CAG GCT CTG GGC ATA CCT GAT GAT GGG GTA<br>CTA GCA GAA AGT GAA |
| RGS2 S277D RP | TTC ACT TTC TGC TAG TAC CCC ATC ATC AGG TAT<br>GCC CAG AGC CTG |
| RGS2 S405D FP | GCC CGA GAT TAC TGG TCT GAT ATG TTC TTC CTG<br>AAG TTC         |
| RGS2 S405D RP | GAA CTT CAG GAA GAA CAT ATC AGA CCA GTA ATC<br>TCG GGC         |
| RGS2 T428D FP | GAG TAC GAG CTG GAG CAA ATA GAT GGG TGG<br>AAC TTT TCT CCA AGG |
| RGS2 T428D RP | CCT TGG AGA AAA GTT CCA CCC ATC TAT TTG CTC                    |

**Supplemental Data. Roy Choudhury and Pandey (2015). Plant Cell**  
**10.1105/tpc.15.00517**

|               |                                                                |
|---------------|----------------------------------------------------------------|
|               | CAG CTC GTA CTC                                                |
| RGS2 S437A FP | TGG AAC TTT TCT CCA AGG TTG GAT TCT GTG CAT<br>GGT ACA GAC GAT |
| RGS2 S437A RP | ATC GTC TGT ACC ATG CAC AGA ATC CAA CCT TGG<br>AGA AAA GTT CCA |
| Gα1 Q223L FP  | CTC TTT GAT GTT GGT GGC CTG AGA AAT GAG AGA<br>AGA AAA         |
| Gα1 Q223L RP  | TTT TCT TCT CTC ATT TCT CAG GCC ACC AAC ATC<br>AAA GAG         |
| Gα1 G196S FP  | GCA AGA GTT CGT ACA ACT AGT GTT GTT GAG ATC<br>CAG TTC         |
| Gα1 G196S RP  | GAA CTG GAT CTC AAC AAC ACT AGT TGT ACG AAC<br>TCT TGC         |
